# Supplementary material
Source: MDPI journal article supplement (https://www.mdpi.com/2071-1050/10/4/1017)
Supplement: s1 [file s1]

## Sheet: liam2.0
SECTION	DIVISION	CLASS	CLASS_N	CLASS_C	CLASS_D	DEM_TYPE	DEM_PRIM	DEM_ACCESS	SOURCE_AREA	SOURCE_SUBSYST	SOURCE_TYPE*	SOURCE	PROD_FRT	DP	ACC_FRT	SINK	GRAPH_GR	GRAPH_MOD*	ECO_TYPE*
1 PROVISIONING	1.1 NUTRITION GOODS	1.1.1	cultivated crops and algae	111cultcr	local production of cereals, vegetables, fruit, etc. for local human consumption	consumption	no	yes	int	mixed	local AS	internal agricultural fields	transport services	farmer's food shops/farmer's markets	transport services	buildings	1	1A	private
1 PROVISIONING	1.1 NUTRITION GOODS	1.1.2	wild plants, algae and their outputs	112wildpl	local production of fungi, asparagus, wildberries for local human consumption	consumption	no	yes	int	natural	local ES	species habitats	any	species habitats	transport services	buildings	2	2A	common
1 PROVISIONING	1.1 NUTRITION GOODS	1.1.3	reared animals from farming and acquaculture and their outputs	113rearan	local production of fish, meat, milk, eggs, etc. for local human consumption	consumption	no	yes	int	mixed	local AS	internal farms	transport services	farmer's food shops/farmer's markets	transport services	buildings	1	1A	private
1 PROVISIONING	1.1 NUTRITION GOODS	1.1.4	wild animals and their outputs	114wildan	local presence of hunting wild animals for local human consumption	consumption	no	yes	int	natural	local ES	species habitats	any	species habitats	transport services	buildings	2	2A	common
1 PROVISIONING	1.1 NUTRITION GOODS	1.1.5	ground water for drinking	115grdrin	local presence of drinking groundwater for local human consumption	consumption	yes	no	partially int	natural	multiscale ES	drinkable groundwater bodies	wells and pipes	buildings	any	buildings	3	3B	private
1 PROVISIONING	1.1 NUTRITION GOODS	1.1.6	surface water for drinking	116surdrin	local presence of drinking surface water for local human consumption	consumption	yes	no	partially int	natural	multiscale ES	water springs	acqueducts and pipes	buildings	any	buildings	3	3B	common
1 PROVISIONING	1.1 NUTRITION GOODS	1.1.7	food from food shops	117foodsh	local presence of food shops	consumption	no	yes	partially int	mixed	multiscale AS	internal or external farms	transport services	shops	transport services	buildings	1	1B	common
1 PROVISIONING	1.2 MATERIALS	1.2.1	fibres and other materials from plants, algae and animals for direct agricultural or diverse use or processing	121ecomat	local production of wool, wood, cotton, timber, cellulose, etc. for local agricultural or diverse use	consumption	no	yes	int	mixed	local AS	internal farms and agricultural fields	transport services	farmer's shops/farmer's markets	transport services	buildings	1	1A	private
1 PROVISIONING	1.2 MATERIALS	1.2.2	ground water for non-drinking purposes	122grnodrin	local presence of non-drinking ground water for local agricultural or diverse use	consumption	yes	no	int	natural	local ES	groundwater bodies	wells and pipes	agricultural fields/buildings	any	agricultural fields/buildings	3	3A	common
1 PROVISIONING	1.2 MATERIALS	1.2.3	surface water for non-drinking purposes	123surnodrin	local presence of non-drinking surface water for local agricultural or diverse use	consumption	yes	no	partially int	natural	multiscale ES	surface water bodies	pipes and plants	agricultural fields/buildings	any	agricultural fields/buildings	3	3B	common
1 PROVISIONING	1.2 MATERIALS	1.2.4	materials from shops	124shopmat	local presence of shops	consumption	no	yes	partially int	mixed	multiscale AS	internal or external firms	transport services	shops	transport services	buildings	1	1B	private
1 PROVISIONING	1.2 MATERIALS	1.2.5	Genetic materials from ecosystems	125genemat	local presence of genetic material (DNA) from wild plants, algae and animals for biochemical industrial and pharmaceutical processes e.g. medicines, fermentation, detoxification; bio-prospecting activities e.g. wild species used in breeding programmes etc.	consumption	no	yes	int	natural	local ES	ecosystem	any	ecosystem	transport services	scientific labs	2	2A	public
1 PROVISIONING	1.3 ENERGY	1.3.1	plant-based resources	131planres	local production of wood fuel, straw, energy plants, crops and algae for biogas, burning and local energy production	consumption	no	no	int	mixed	local AS	farms with biogas plants or biomass plants	pipes and plants	buildings	any	buildings	3	3A	private
1 PROVISIONING	1.3 ENERGY	1.3.2	animal-based resources	132animres	local production of oils, animal wastes, etc., for biogas, burning and local energy production	consumption	yes	no	int	mixed	local AS	farms with biogas plants	pipes and plants	buildings	any	buildings	3	3A	private
1 PROVISIONING	1.3 ENERGY	1.3.3	animal-based energy	133anener	local presence of animal for physical labour (horses, cows, etc.)	consumption	yes	no	int	mixed	local AS	farms with animals for work	any	farms with animals for work	any	farms with animals for work	5	5A	private
1 PROVISIONING	1.3 ENERGY	1.3.4	energy from fossil fuels	134netener	local presence of energy distribution networks	consumption	yes	no	ext	human	external US	Oilfield, gasfield	pipes and plants	buildings	any	buildings	3	3C	private
2 REGULATING	2.1 regulation of natural physical phenomena	2.1.1	buffering and attenuation of mass flows in river basins and flood protection by natural subsystem	211ecoflood	local presence of natural elements or appropriate land coverages for reducing the slide of detritus and the flood risk to the river valleys	risk reduction	no	no	partially int	natural	multiscale ES	permeable lands	soil (slope)	permeable lands, downstream areas	any	permeable lands, downstream areas	4	4B	public
2 REGULATING	2.1 regulation of natural physical phenomena	2.1.2	buffering and attenuation of mass flows in river basins and flood protection by human subsystem	212urbflood	local presence of man-made elements or appropriate land coverages for reducing the slide of detritus and the flood risk to the river valleys	risk reduction	no	no	partially int	human	multiscale US	protective urban elements (water retention basins)	soil (slope)	downstream areas	any	downstream areas	4	4B	public
2 REGULATING	2.1 regulation of natural physical phenomena	2.1.3	mass stabilisation and control of erosion rates by natural subsystem	213ecoeros	local presence of vegetation cover protecting/stabilising terrestrial, coastal and marine ecosystems, coastal wetlands, dunes;	risk reduction	no	no	partially int	natural	multiscale ES	protective vegetation coverages	soil (slope)	protective vegetation coverages, downstream areas	any	protective vegetation coverages, downstream areas	4	4B	public
2 REGULATING	2.1 regulation of natural physical phenomena	2.1.4	mass stabilisation and control of erosion rates by human subsystem	214urberos	local presence of man-made elements protecting/stabilising terrestrial, coastal and marine ecosystems, coastal wetlands, dunes;	risk reduction	no	no	partially int	human	multiscale US	protective urban coverages	soil (slope)	protective urban coverages, downstream areas	any	protective urban coverages, downstream areas	4	4B	public
2 REGULATING	2.2 mitigation of human impact	2.2.1	mediation of smell/noise/visual impacts by natural subsystem	221ecomediat	local presence of visual screening of transport corridors e.g. by trees; Green infrastructure to reduce noise and smells	risk reduction	no	no	int	natural	local ES	natural element that mediates the impact	lines of sight, smell, noise	buildings	any	buildings	4	4A	public
2 REGULATING	2.2 mitigation of human impact	2.2.2	mediation of smell/noise/visual impacts by human subsystem	222urbmediat	man-made infrastructure to reduce noise and smells	risk reduction	no	no	int	human	local ES	urban element that mediates the impact	lines of sight, smell, noise	buildings	any	buildings	4	4A	public
2 REGULATING	2.3 Maintenance of physical, chemical, biological conditions	2.3.1	pest and disease control by natural subsystem	231ecopestcontr	Pest and disease control including invasive alien species In cultivated and natural ecosystems and human populations by ecosystems	risk reduction	no	no	int	natural	local ES	natural enemies habitats	soil, water, air	agricultural fields, gardens	any	agricultural fields, gardens	4	4A	public
2 REGULATING	2.3 Maintenance of physical, chemical, biological conditions	2.3.2	pollination and seed dispersal	232pollseeds	Pollination by bees and other insects; seed dispersal by insects, birds and other animals	risk reduction	no	no	int	natural	local ES	pollinator habitats	soil, water, air	agricultural fields, gardens	any	agricultural fields, gardens	4	4A	public
2 REGULATING	2.3 Maintenance of physical, chemical, biological conditions	2.3.3	micro and regional climate regulation	233ecomicroclim	local presence of natural elements modifying temperature, humidity, wind fields and maintaining rural and urban climate and air quality and regional precipitation/temperature patterns	risk reduction	no	no	int	natural	local ES	vegetated areas	air	buildings	any	buildings	4	4A	public
2 REGULATING	2.3 Maintenance of physical, chemical, biological conditions	2.3.4	weathering, decomposition and fixing processes	234pedogen	Maintenance of bio-geochemical conditions of soils including fertility, nutrient storage, or soil structure; includes biological, chemical, physical weathering, decomposition/mineralisation of dead organic material, nitrification, denitrification etc.), N-fixing and other bio-geochemical processes and pedogenesis	risk reduction	no	no	int	natural	local ES	soil	any	soil	any	soil	5	5A	public
2 REGULATING	2.3 Maintenance of physical, chemical, biological conditions	2.3.5	mainteinance of chemical condition of freshwaters by natural subsystem	235ecowatqual	Maintenance / buffering of chemical composition of freshwater column and sediment to ensure favourable living conditions for biota e.g. by denitrification, re-mobilisation/re-mineralisation of phosphorous, etc.	risk reduction	no	no	int	natural	local ES	vegetated areas	soil (slope)	water courses and acquifers	any	water courses and acquifers	3	3A	public
2 REGULATING	2.3 Maintenance of physical, chemical, biological conditions	2.3.6	manteinance of chemical condition of freshwaters by human subsystem	236urwatqual	purification of freshwater by man-made elements to ensure favourable living conditions for biota e.g. by denitrification, re-mobilisation/re-mineralisation of phosphorous, etc.	risk reduction	yes	no	int	human	local US	depurators	pipes and plants	water courses and acquifers	any	water courses and acquifers	3	3A	public
3 CULTURAL	3.1. physical and intellectual interaction with agri-nat. Environment	3.1.1	landscape aesthetic	311ecoaes	local presence of typical and inspiring landscapes	direct use	no	yes	partially int	mixed	multiscale AS	landscape elements	lines of sight	viewpoint	transport services	buildings	1	1B	public
3 CULTURAL	3.1. physical and intellectual interation with agri-nat. Environment	3.1.2	natural educational services	312ecoedu	local presence of natural elements that can be used for educational purposes (parks, gardens, farms for educational purposes etc.)	direct use	no	yes	int	mixed	local AS	educational farm	any	educational farm	transport services	buildings	2	2A	public
3 CULTURAL	3.1. physical and intellectual interation with agri-nat. Environment	3.1.3	possibility of experiential and physical use of plants, animals and land-/seascapes in different environmental settings	313ecouse	local presence of natural elements for recreational and cultural uses (panoramic views, adventure parks, bird watching, trekking, etc.)	direct use	no	yes	int	natural	local ES	agricultural or natural areas with some heritage value	any	agricultural or natural areas with some recreational potential	transport services	buildings	2	2A	public
3 CULTURAL	3.1. physical and intellectual interation with agri-nat. Environment	3.1.4	natural cultural heritage	314ecoher	local presence of natural historic records, cultural heritage e.g. preserved in water bodies and soils	direct use	no	yes	int	natural	local ES	agricultural or natural areas with some recreational potential	any	agricultural or natural areas with some recreational potential	transport services	buildings	2	2A	public
3 CULTURAL	3.1. physical and intellectual interation with agri-nat. Environment	3.1.5	natural elements of scientific interest	315ecosci	local presence of natural subject matter for research on location	direct use	no	yes	int	natural	local ES	agricultural or natural areas with some scientific interes	any	agricultural or natural areas with some scientific interes	transport services	buildings	2	2A	public
3 CULTURAL	3.2. physical and intellectual interation with urban Environment	3.2.1	urban entertainment services	321urent	local presence of man-made elements for recreational and entertainmental use (hotels, restaurants, cafés, nightlife, theatres, etc. )	direct use	no	yes	int	human	local US	urban entertainment elements	any	urban entertainment elements	transport services	buildings	2	2A	club
3 CULTURAL	3.2. physical and intellectual interation with urban Environment	3.2.2	sport centres	322sports	local presence of football pitches, swimming pools, running pitches, etc.	direct use	no	yes	int	human	local US	sport centres	any	sport centres	transport services	buildings	2	2A	club
3 CULTURAL	3.2. physical and intellectual interation with urban Environment	3.2.3	urban cultural heritage	323urher	local presence of man-made historic records, cultural heritage e.g. preserved in museums, art galleries, churchs, chapels etc.	direct use	no	yes	int	human	local US	urban historical and cultural resources	any	historical and cultural resources	transport services	buildings	2	2A	public
3 CULTURAL	3.2. physical and intellectual interation with urban Environment	3.2.4	urban cultural services	324urcult	local presence of man-made subject matter for research on location (museums, libraries, archives etc.)	direct use	no	yes	int	human	local US	libraries, museums and art galleries	any	libraries, museums and art galleries	transport services	buildings	2	2A	club
3 CULTURAL	3.3 spiritual interaction with environment	3.3.1	sacred or symbolic values of natural subsystem	331ecosymb	local presence of emblematic plants and animals e.g. national symbols such as American eagle, spiritual, ritual identity, holy places; sacred plants and animals and their parts	direct use	no	yes	int	natural	external ES	agricultural or natural areas with some agri-natural symbolic values	any	agricultural or natural areas with some agri-natural symbolic values	transport services	buildings	2	2A	public
3 CULTURAL	3.3 spiritual interaction with environment	3.3.2	sacred or symbolic values of human subsystem	332urspir	local presence of emblematic man-made elements e.g. national symbols such as monuments, spiritual, ritual identity, holy urban places; sacred man-made elements, local presence of churches, chapels, oratories, monasteries, etc.	direct use	no	yes	int	human	local US	urban spiritual services	any	urban spiritual services	transport services	buildings	2	2A	public
4 SOCIAL	4.1 networks for mobility	4.1.1	roads	411roads	local presence of roads	direct use	yes	no	Int	human	local US	roads	any	roads	any	roads	5	5A	public
4 SOCIAL	4.1 networks for mobility	4.1.2	railways	412rail	local presence of railway stations	direct use	no	yes	int	human	local US	railways	any	trains stations	transport services	buildings	2	2A	public
4 SOCIAL	4.1 networks for mobility	4.1.3	airports	413airport	local presence of airports	direct use	no	yes	ext	human	external US	airport	any	airport	transport services	buildings	2	2B	public
4 SOCIAL	4.1 networks for mobility	4.1.4	public transport service	414pubtrans	local presence of public transport network	direct use	no	yes	int	human	local US	buses	any	bus stops	transport services	buildings	2	2A	public
4 SOCIAL	4.1 networks for mobility	4.1.5	navigable lakes, rivers and streams	415harbor	local presence of lakes rivers and canals for the transport of people and things	direct use	no	yes	int	mixed	local AS	lakes and waterways	any	harbors	transport services	buildings	2	2A	public
4 SOCIAL	4.1 networks for mobility	4.1.6	internet and phone networks	416adsl	local presence of internet, telephone networks, etc.	direct use	yes	no	int	human	local US	ADSL networks	any	ADSL networks	any	buildings	5	5A	club
4 SOCIAL	4.2 urban educational services	4.2.1	nurseries and primary schools	421schools	local presence of nurseries and primary schools	direct use	no	yes	int	human	local US	schools	any	schools	transport services	buildings	2	2A	public
4 SOCIAL	4.2 urban educational services	4.2.2	universities	422uni	local presence of universities, music academies, art academies, etc.	direct use	no	yes	int	human	local US	university	any	university	transport services	buildings	2	2A	public
4 SOCIAL	4.3 health services	4.3.1	medical surgeries	431medsur	local presence of medical facilities for outpatient services (specialised and basic medical surgeries, health counselling, etc.).	direct use	no	yes	int	human	local US	surgeries	any	surgeries	transport services	buildings	2	2A	public
4 SOCIAL	4.3 health services	4.3.2	hospitals	432hospital	local presence of hospitals, public or private clinics, etc.	direct use	no	yes	int	human	local US	hospitals	any	hospitals	transport services	buildings	2	2A	public
4 SOCIAL	4.3 health services	4.3.3	care homes for elderly and disabled people, rehabilitation centres	433rehabil	local presence of care homes for elderly and disabled people, rehabilitation centres, etc.	direct use	no	yes	int	human	local US	rehabilitation centre hospices	any	rehabilitation centre hospices	transport services	buildings	2	2A	public
4 SOCIAL	4.3 health services	4.3.4	pharmacies	434pharm	local presence of pharmacies and parapharmacies	direct use	no	yes	int	human	local US	pharmacies	any	pharmacies	transport services	buildings	2	2A	public
4 SOCIAL	4.4 security services	4.4.1	security services	441secur	local presence of firefighters stations, forest rangers, police stations, etc.	direct use	no	yes	int	human	local US	public security forces	any	public security forces	transport services	buildings	2	2A	public
4 SOCIAL	4.5 other social services	4.5.1	other social services	451others	local presence of services for citizens not included in the previous categories (administrative services, postal, banking, financial, legal, etc.).	direct use	no	yes	int	human	local US	other services offices	any	other services offices	transport services	buildings	2	2A	public

## Sheet: metadata
	column name	description	possible levels of the variable
service classification	SECTION	service section	many
	DIVISION	service division	many
	CLASS	service class	many
	CLASS_N	name of the services class	many
	CLASS_C	code of the services class	many
	CLASS_D	description of the service class	many
demand characterization	DEM_TYPE	demand type	direct use/consumption/risk reduction
	DEM_PRIM	primary service	yes/no
	DEM_ACCESS	accessibility need	yes/no
source characterization	SOURCE_AREA	relation between source and Perugia study area	int(internal)/partially int (partially internal)/ext(external)
	SOURCE_SUBSYST	subsystem producing the source	human/mixed/natural
	SOURCE_TYPE	source type	local ES/local AS/local US/multiscale ES/multiscale AS/multiscale US/external ES/external AS/external US
spatial models definition	SOURCE	empirically evident source	many
	PROD_FRT	empirically evident service production flow routing type	many
	DP	empirically evident delivery point	many
	ACC_FRT	empirically evident accessibility flow routing type	many
	SINK	empirically evident sink	many
	GRAPH_GR	graphic group to which the servce belong	many
	GRAPH_MOD*	graphic model to which the service belong	many
economic type	ECO_TYPE	economic type of the service	private/common/club/public
